# Supplementary material for: A graphdiyne based separator toward high performance activated electrolyte-enhanced supercapacitors
Source: Royal Society of Chemistry journal article supplement (doi:10.1039/d3ta07047f), 2024-01-01
Supplement: d3ta07047f1.pdf [file d3ta07047f1.pdf]

## Supporting Information

### **Graphdiyne based separator toward high performance activated electrolyte-enhanced supercapacitors**

Na Liang<sup>a</sup>, Xueyan Wu<sup>a</sup>, Xiuli Zhang<sup>a</sup>, Yan Lv<sup>a</sup>, Jixi Guo<sup>\*a</sup>, Renhe Guo<sup>a</sup>, Yingfu Zhu<sup>a</sup>, Huibiao Liu<sup>\*abc</sup>, Dianzeng Jia<sup>\*a</sup>

<sup>a</sup>State Key Laboratory of Chemistry and Utilization of Carbon Based Energy Resources; Key Laboratory of Advanced Functional Materials, Autonomous Region

Institute of Applied Chemistry, College of Chemistry, Xinjiang University,

Urumqi, 830046, Xinjiang P.R. China

Email: jxguo1012@163.com; jdz@xju.edu.cn

<sup>b</sup>CAS Key Laboratory of Organic Solids, Beijing National Laboratory for Molecular Sciences, CAS Research/Education Center for Excellence in Molecular Sciences,

Institute of Chemistry, Chinese Academy of Sciences,

Beijing, 100190, P. R. China

Email: liuhb@iccas.ac.cn

<sup>c</sup>University of Chinese Academy of Sciences,

Beijing, 100049, P. R. China,

## **Experimental Section**

### **Materials**

Polypropylene membrane (PP, NKK-MPF30AC-100) was purchased from Nippon Kodoshi Corporation. polyvinyl alcohol (PVA 98.0-99.0 mol%) and tetrabutylammonium fluoride (TBAF) were purchased from Aladdin Chemical Reagents, Inc. Unless otherwise stated, other analytical chemicals were used as received.

### **Synthesis of GDY**

Hexaethynylbenzene (HEB) was synthesized according to a reported synthetic method<sup>1</sup>. HEB (20, 25, 30, 35, 40 mg) was dissolved in ethyl acetate and pyridine solution and dropped into copper foil solution containing pyridine. The mixture was heated at 50 °C in nitrogen for 3 days while avoiding light. Then the copper foil coated with GDY membrane was washed several times with acetone. GDY membrane was obtained by drying at room temperature.

### **Synthesis of GDY/PVA membrane**

GDY/PVA membrane was synthesized by in situ composite method. First, PVA (4 g) dissolved in deionized water (50 mL). The blend was heated at 90 °C for 3 h with continuous stirring until the solution became transparent. After that, 8% (w/w) of the PVA solution was prepared. Then the copper foil coated with GDY membranes (20, 25, 30, 35, 40 mg) was placed in a petri dish, 15 mL PVA solution was added, and placed in an oven at 60 °C for 8 h. After drying, the copper sheet was removed and naturally exfoliated. The prepared GDY/PVA composite membranes were denoted as GDY/PVA-20, GDY/PVA-25, GDY/PVA-30, GDY/PVA-35 and GDY/PVA-40, respectively.

### **Structure characterizations**

The FTIR spectra of the samples were recorded by VERTEX70 spectrometer. Scanning electron microscopy (SEM, Japan Hitachi SU-4800) was used to observe the microstructure of the material. TEM image was studied by a JEM 2100F (200 kV) high resolution transmission electron microscopy (TEM). X-ray photoelectron spectroscopy (XPS, VG Scientific ESCALab220i-XL (Al K $\alpha$  radiation)) was used to determine the surface chemical properties of the material. Structure information of samples was studied by X-ray powder diffraction (XRD, Japan Rigaku D/max-2500 rotation anode X-ray diffractometer and graphite-monochromatized Cu K $\alpha$  radiation) and Raman spectra (Raman; NT-MDT NTEGRA Spectra). The contact angle was measured with a contact angle meter (JJ2000B2, China Electric Power Corporation). Stress-strain was tested by a microcomputer-controlled electronic universal testing machine (MTS, E44.304) with the tensile speed set at 0.5 mm/min.

### **Proton conductivity**

The ionic conductivity ( $\sigma$ ) of the membrane was measured by electrochemical impedance spectroscopy (CHI 770, Shanghai Chenhua Co., Ltd.) in the frequency range of 1 Hz~100 kHz. The 1 cm  $\times$  1 cm sample was sandwiched between two stainless steel electrodes at room temperature. The sample was soaked in deionized water before measurement. The transverse  $\sigma$  value of the membrane is calculated from the impedance data using the following formula.

$$\sigma = \frac{d}{R \times S} \quad (1)$$

where  $d$  (cm) and  $S$  (cm<sup>2</sup>) are the thickness and surface area of the samples, respectively.  $R$  originates from the low intersection point between the high frequency semicircle and the  $Z''$  axis on the complex

### **Electrochemical characterization**

The electrodes were prepared on stainless steel mesh using activated carbon (AC, 80 wt%), polytetrafluoroethylene (5 wt%), and carbon black (15 wt%). The area loading amount of stainless steel mesh was 5–7 mg cm<sup>-2</sup>. The capacitance performance of SC was tested on the dual-electrode battery of CHI 760E electrochemical workstation. 1 M H<sub>2</sub>SO<sub>4</sub> mixed with HQ aqueous solution as electrolyte. The cell capacitance ( $C_{\text{cell}}$ , F g<sup>-1</sup>), electrode specific capacitance ( $C_{\text{sp}}$ , F g<sup>-1</sup>), energy density ( $E$ , Wh kg<sup>-1</sup>) and power density ( $P$ , W kg<sup>-1</sup>) using the following equation<sup>2-7</sup>.

$$C_{\text{cell}} = \frac{2 \times I \times \Delta t}{M \times \Delta V} \dots\dots\dots(2)$$

$$C_{\text{sp}} = 4 C_{\text{cell}} \dots\dots\dots(3)$$

$$E = \frac{C_{\text{cell}} \times \Delta V^2}{2 \times 3.6} \dots\dots\dots(4)$$

$$P = \frac{3600 \times E}{\Delta t} \dots\dots\dots(5)$$

Where  $I$  is the discharge current (A),  $\Delta t$  is the discharge time (s),  $\Delta V$  is the potential window (V), and  $M$  is the total mass of the active materials used in the two electrodes (mg).

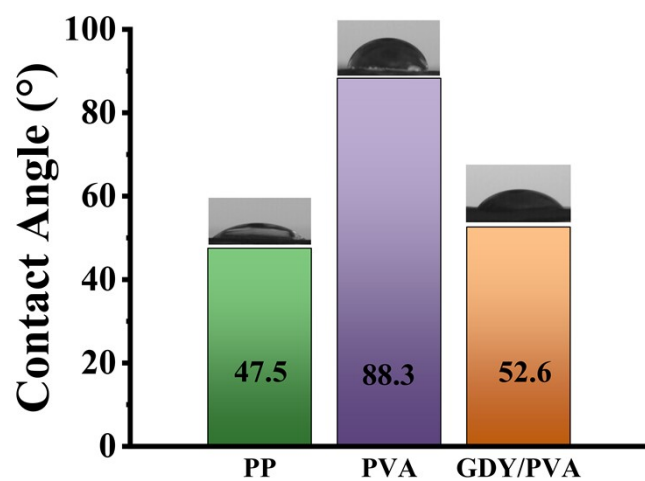

Figure S1. Contact angle of different membranes.

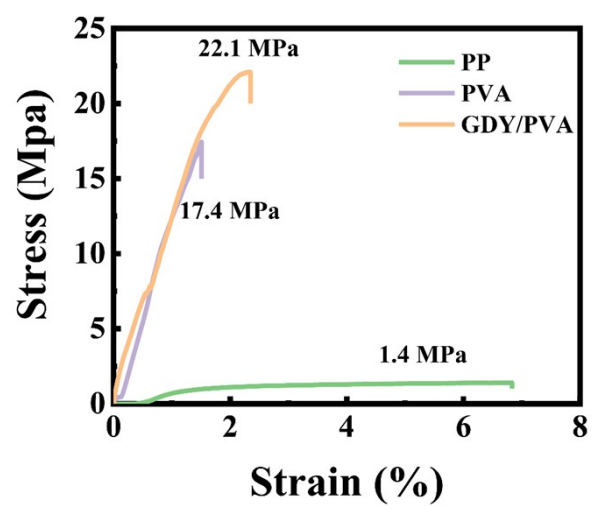

Figure S2. Stress-strain curves of different membranes.

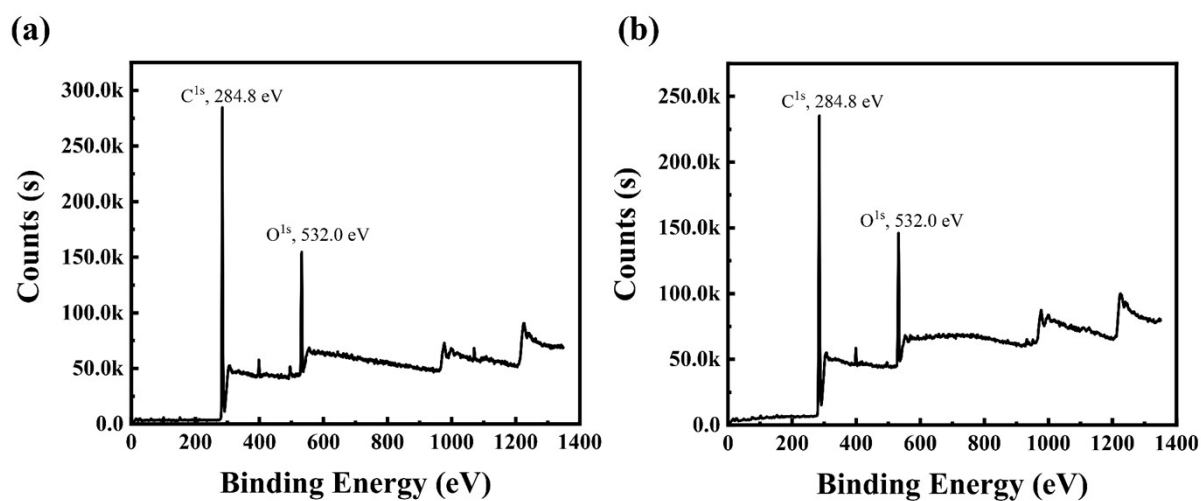

Figure S3. (a)XPS survey scan of GDY, (b) XPS survey scan of GDY/PVA membrane.

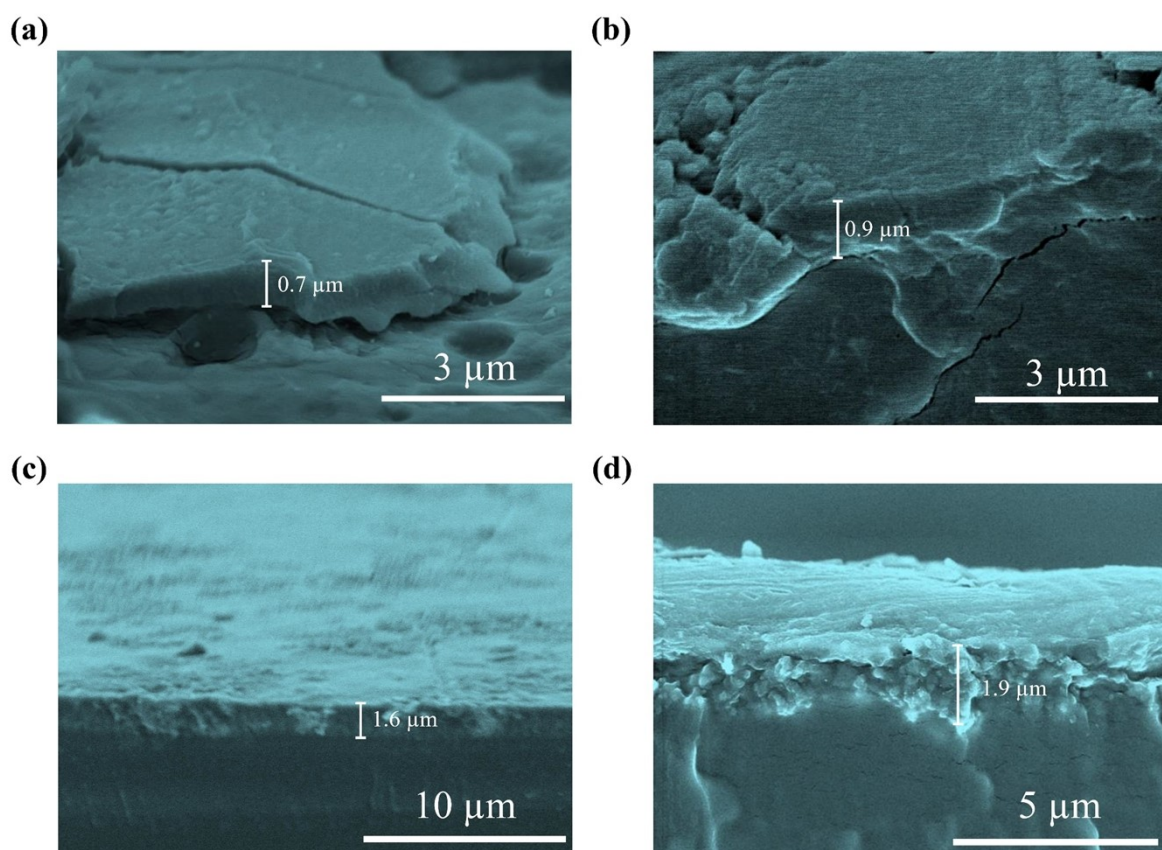

Figure S4. (a) cross-sectional SEM image of GDY/PVA-20, (b) cross-sectional SEM image of GDY/PVA-25, (c) cross-sectional SEM image of GDY/PVA-35, (d) cross-sectional SEM image of GDY/PVA-40.

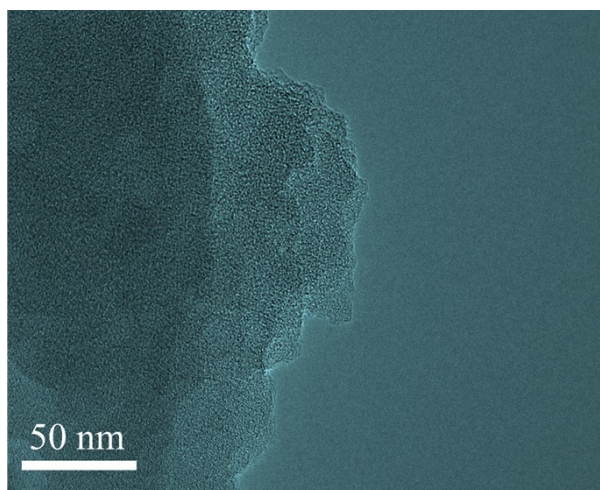

Figure S5. TEM image of GDY.

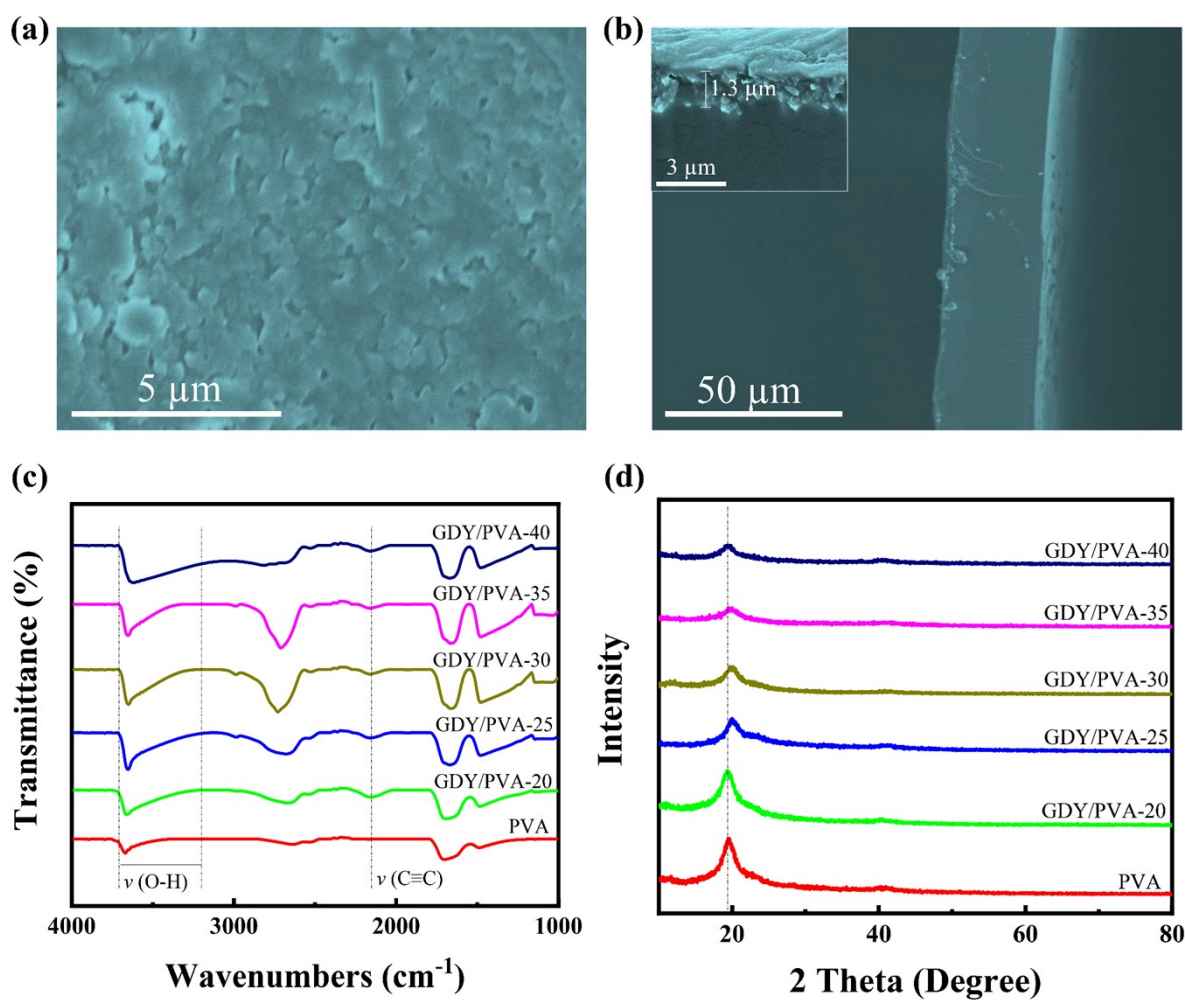

Figure S6. (a) SEM image of GDY/PVA-30 membrane, (b) cross-sectional SEM image of GDY/PVA-30 membrane at different magnifications, (c) FTIR spectra of pure PVA and hybrid membranes, (d) XRD patterns of pure PVA and hybrid membranes.

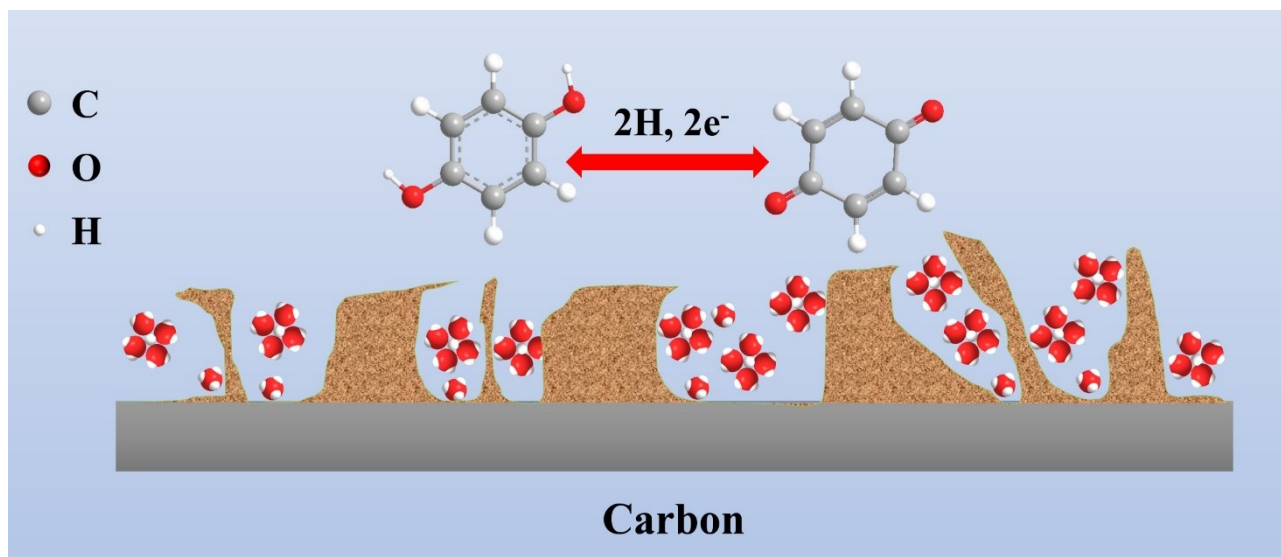

Figure S7. Redox reactions initiated by hydroquinone/ p-benzoquinone molecules.

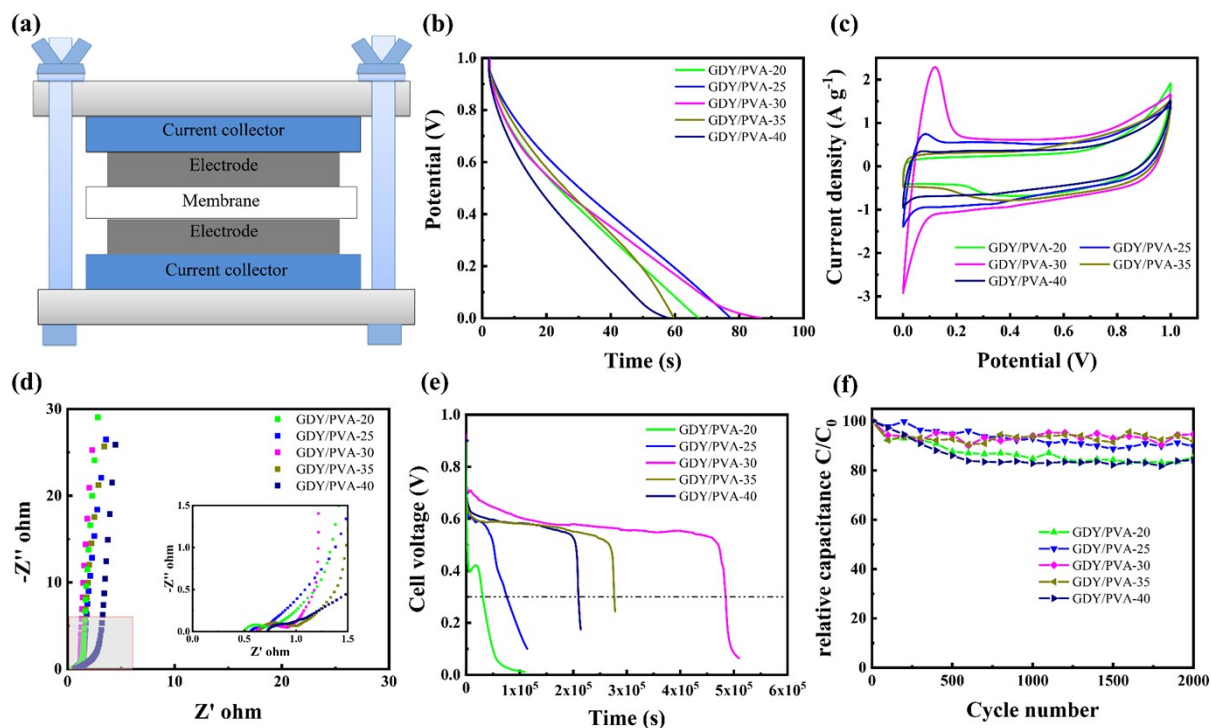

Figure S8. The electrolyte was 1 M H<sub>2</sub>SO<sub>4</sub> with 0.2 M HQ added, and the membrane was composed of GDY composite films of different concentrations (a) Schematic diagram of the supercapacitor device, (b) Charge/discharge curves of supercapacitor with different membranes at current density 1 A g<sup>-1</sup>, (c) CVs of supercapacitor with different membranes at scan rate of 10 mV s<sup>-1</sup>, (d) EIS of supercapacitor with different membranes, (e) Self-discharge

of the supercapacitors with different membranes, (f) Cycle stability of supercapacitor at current density  $1 \text{ A g}^{-1}$ .

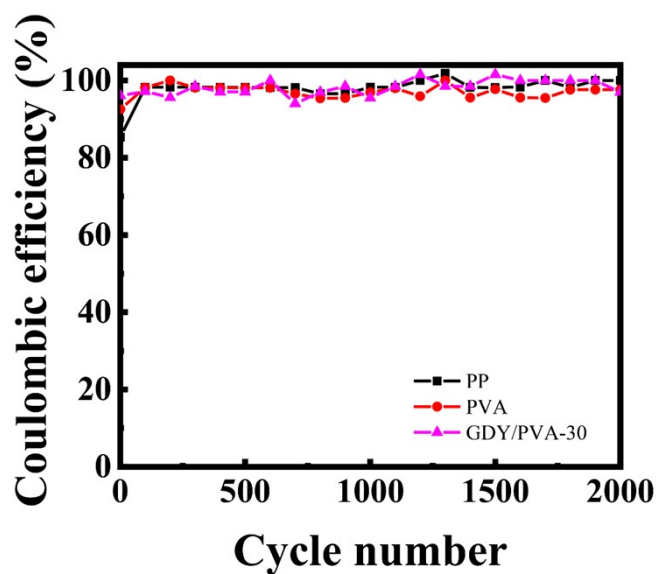

Figure S9. The coulombic efficiency of different membrane.

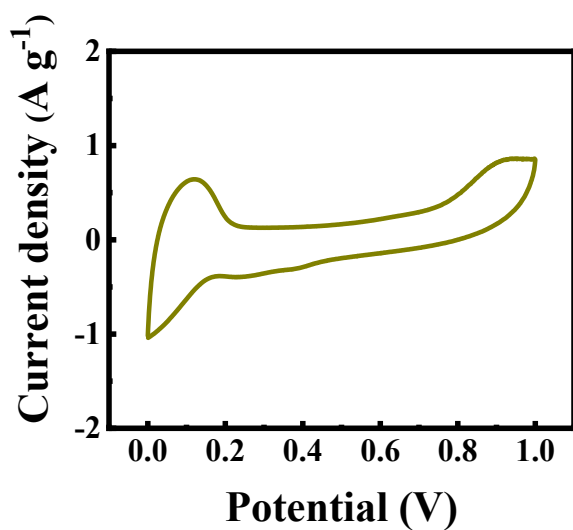

Figure S10. Cyclic voltammetry (CV) curves at a scan rate of  $5 \text{ mV s}^{-1}$  by use PVA membrane.

Table S1 Membrane thickness, Solution resistance, Charge-transfer resistance, and ionic conductivity of the membranes containing.

| Sample     | Membrane thickness<br>/ $\mu\text{m}$ | Solution resistance<br>/ $R_s \Omega$ | Charge-transfer<br>resistance / $R_{ct} \Omega$ | ionic conductivity<br>/ $10^{-2} \text{ S cm}^{-1}$ |
|------------|---------------------------------------|---------------------------------------|-------------------------------------------------|-----------------------------------------------------|
| GDY/PVA-20 | 27.7                                  | 0.535                                 | 0.107                                           | 9.55                                                |
| GDY/PVA-25 | 27.9                                  | 0.562                                 | 0.111                                           | 11.6                                                |
| GDY/PVA-30 | 28.3                                  | 0.642                                 | 0.213                                           | 12.3                                                |
| GDY/PVA-35 | 28.6                                  | 0.651                                 | 0.255                                           | 13.0                                                |
| GDY/PVA-40 | 28.9                                  | 0.728                                 | 0.216                                           | 12.2                                                |

Table S2. Electrical properties of GDY composite membranes with different concentrations

| Sample     | Specific capacitance<br>(F g <sup>-1</sup> ) | Energy density<br>(Wh kg <sup>-1</sup> ) | Power density<br>(W kg <sup>-1</sup> ) | Retention capability                                    | self-discharge<br>(s, 1V-0.3V) |
|------------|----------------------------------------------|------------------------------------------|----------------------------------------|---------------------------------------------------------|--------------------------------|
| PP         | 352.7                                        | 11.4                                     | 604.1                                  | 78.98 % after 2000 cycles                               | 4343                           |
| PVA        | 294.6                                        | 9.1                                      | 590.9                                  | 81.11 % after 2000 cycles                               | 18450                          |
| GDY/PVA-20 | 337.4                                        | 10.9                                     | 604.8                                  | 85.35 % after 2000 cycles                               | 30900                          |
| GDY/PVA-25 | 388.8                                        | 12.6                                     | 604.4                                  | 89.74 % after 2000 cycles                               | 75920                          |
| GDY/PVA-30 | 443.54                                       | 14.0                                     | 596.1                                  | 94.63 % after 2000 cycles<br>79.99 % after 20000 cycles | 484700                         |
| GDY/PVA-35 | 298.7                                        | 9.7                                      | 603.7                                  | 92 % after 2000 cycles                                  | 276600                         |
| GDY/PVA-40 | 293.7                                        | 9.3                                      | 596.9                                  | 84.26 % after 2000 cycles                               | 209700                         |

Table S3. Comparison of specific capacitance and energy density with different reported values

| Electrode | Separator                                              | Electrolyte                                       | Specific capacitance<br>(F g <sup>-1</sup> ) | self-discharge<br>(s) | Retention capability                                  | Ref.      |
|-----------|--------------------------------------------------------|---------------------------------------------------|----------------------------------------------|-----------------------|-------------------------------------------------------|-----------|
| GHG       | Nafion® 117                                            | H <sub>2</sub> SO <sub>4</sub> + HQ               | C <sub>c</sub> 75.0 @ 2.1 A g <sup>-1</sup>  | 4686<br>(1-0.3V)      |                                                       | 8         |
| GHG       | cellulose acetate                                      | H <sub>2</sub> SO <sub>4</sub> + HQ               | C <sub>c</sub> 100.2 @ 1.3 A g <sup>-1</sup> | 1462<br>(1-0.3V)      |                                                       | 8         |
| GHG       | cellulose acetate                                      | CuSO <sub>4</sub> +H <sub>2</sub> SO <sub>4</sub> | C <sub>c</sub> 113 @ 2.1 A g <sup>-1</sup>   | 7727<br>(1-0.3V)      |                                                       | 8         |
| MXene     | Celgard 3501                                           | H <sub>2</sub> SO <sub>4</sub> + KI               | C <sub>c</sub> 166 @ 1A g <sup>-1</sup>      |                       | 100% after 5000 cycles                                | 9         |
| MWCNTs    | glassy fibrous                                         | H <sub>2</sub> SO <sub>4</sub> +indigo carmine    | C <sub>sp</sub> 50@0.88mA cm <sup>-2</sup>   |                       | 70% after 5000 cycles                                 | 10        |
| AC        | polypropylene sheet                                    | H <sub>2</sub> SO <sub>4</sub> + K I              | C <sub>sp</sub> 912@2mA cm <sup>-2</sup>     | 1800<br>(1-0.3V)      | 130% (5mA cm <sup>-2</sup> )                          | 2         |
| AC        | Glass microfiber                                       | H <sub>2</sub> SO <sub>4</sub> + K I              | C <sub>sp</sub> 235 @ 1 A g <sup>-1</sup>    | 25200 (1-0.3V)        |                                                       | 11        |
| NPS-800   | Swagelok®cells                                         | H <sub>2</sub> SO <sub>4</sub> + KI               | C <sub>c</sub> 70 @ 0.7 A g <sup>-1</sup>    |                       | 86.2% after 5000 cycles                               | 12        |
| AC        | Anion exchange membranes (FAS15)                       | SnF <sub>2</sub> + VOSO <sub>4</sub>              |                                              | 21600<br>(1.35-1.2V)  |                                                       | 13        |
| AC        | C <sub>6</sub> mim <sup>+</sup> -MXene Janus separator | Na <sub>2</sub> SO <sub>4</sub> + KI              | 172 F g <sup>-1</sup> @0.5A g <sup>-1</sup>  | 86400<br>(1.6-1.15 V) | 120% after 15 000 cycles                              | 14        |
| AC        | GDYO/PVA                                               | H <sub>2</sub> SO <sub>4</sub> + KI               | C <sub>sp</sub> 325.6@1A g <sup>-1</sup>     | 37160<br>(1-0.3V)     | 96.2% after 1000 cycles                               | 15        |
| AC        | GDY/PVA                                                | H <sub>2</sub> SO <sub>4</sub> + HQ               | C <sub>sp</sub> 443.54@1A g <sup>-1</sup>    | 484700<br>(1-0.3V)    | 94.63% after 2000 cycles<br>79.99% after 20000 cycles | This work |

GHG: graphene hydrogel

MXene: Ti<sub>3</sub>C<sub>2</sub>T<sub>x</sub>

AC: Activated carbon

## References

- G. Li, Y. Li, H. Liu, Y. Guo, Y. Li and D. Zhu, *Chem. Commun.*, 2010, **46**, 3256-3258.
- S. T. Senthilkumar, R. K. Selvan, Y. S. Lee and J. S. Melo, *J. Mater. Chem. A.*, 2013, **1**, 1086-1095.
- L. Q. Mai, A. Minhas-Khan, X. Tian, K. M. Hercule, Y. L. Zhao, X. Lin and X. Xu, *Nat Commun.*, 2013, **4**, 2923.
- S. Zhang and N. Pan, *Adv. Energy Mater.*, 2015, **5**, 1401401.
- N. Yang, S. Yu, W. Zhang, H. M. Cheng, P. Simon and X. Jiang, *Adv Mater.*, 2022, **34**, e2202380.
- X. Chang, M. F. El-Kady, A. Huang, C. W. Lin, S. Aguilar, M. Anderson, J. Z. J. Zhu and R. B. Kaner, *Adv. Funct. Mater.*, 2021, **31**.
- V. Sharma, U. Narayan Pan, T. Ibomcha Singh, A. Kumar Das, N. Hoon Kim and J. Hee Lee, *Chem. Eng. J.*,

- 2021, **415**.
8. L. Chen, H. Bai, Z. Huang and L. Li, *Energy Environ. Sci.*, 2014, **7**, 1750-1759.
  9. J. Fu, L. Li, D. Lee, J. M. Yun, B. K. Ryu and K. H. Kim, *Appl. Surf. Sci.*, 2020, **504**, 144250.
  10. S. Roldán, Z. González, C. Blanco, M. Granda, R. Menéndez and R. Santamaría, *Electrochim Acta.*, 2011, **56**, 3401-3405.
  11. M. Meller, J. Menzel, K. Fic, D. Gastol and E. Frackowiak, *Solid State Ionics.*, 2014, **265**, 61-67.
  12. K. Jayaramulu, D. P. Dubal, B. Nagar, V. Ranc, O. Tomanec, M. Petr, K. K. R. Datta, R. Zboril, P. Gomez-Romero and R. A. Fischer, *Adv Mater.*, 2018, **30**, e1705789.
  13. J. Lee, B. Krüner, A. Tolosa, S. Sathyamoorthi, D. Kim, S. Choudhury, K.-H. Seo and V. Presser, *Energy Environ Sci.*, 2016, **9**, 3392-3398.
  14. W. Yang, Q. Han, W. Li, M. Wu, J. Yao, M. Zhao and X. Lu, *Energy Stor. Mater.*, 2022, **52**, 29-39.
  15. N. Liang, X. Wu, Y. Lv, J. Guo, X. Zhang, Y. Zhu, H. Liu and D. Jia, *J. Mater. Chem. C.*, 2022, **10**, 2821-2827.
